# Supplementary material for: Host DNA depletion methods and genome-centric metagenomics of bovine hindmilk microbiome
Source: PubMed Central journal article supplement (PMC10826364; doi:10.1128/msphere.00470-23), 2023-12-06
Supplement: msphere.00470-23-s0001.pdf [file msphere.00470-23-s0001.pdf]

# Host DNA depletion methods and genome-centric metagenomics of bovine hindmilk microbiome

Vinicius da Silva Duarte<sup>1</sup> & Davide Porcellato<sup>1</sup>

<sup>1</sup> Faculty of Chemistry, Biotechnology and Food Science, Norwegian University of Life Sciences, NMBU, Ås, Norway.

Corresponding author: [vinicius.da.silva.duarte@nmbu.no](mailto:vinicius.da.silva.duarte@nmbu.no)

**Supplementary Figure 1.** Beta-dispersion (A and B) and beta-diversity (C and D) analyses based on Jaccard (A and C) and Bray-Curtis (B and D) distances for the four different groups. ML: MoLYsis complete5 kit; ML\_NM: MoLYsis complete5 kit performed with NEBNext Microbiome DNA Enrichment kit; PF: DNeasy PowerFood Microbial kit; PF\_NM: DNeasy PowerFood Microbial kit performed with NEBNext Microbiome DNA Enrichment kit.

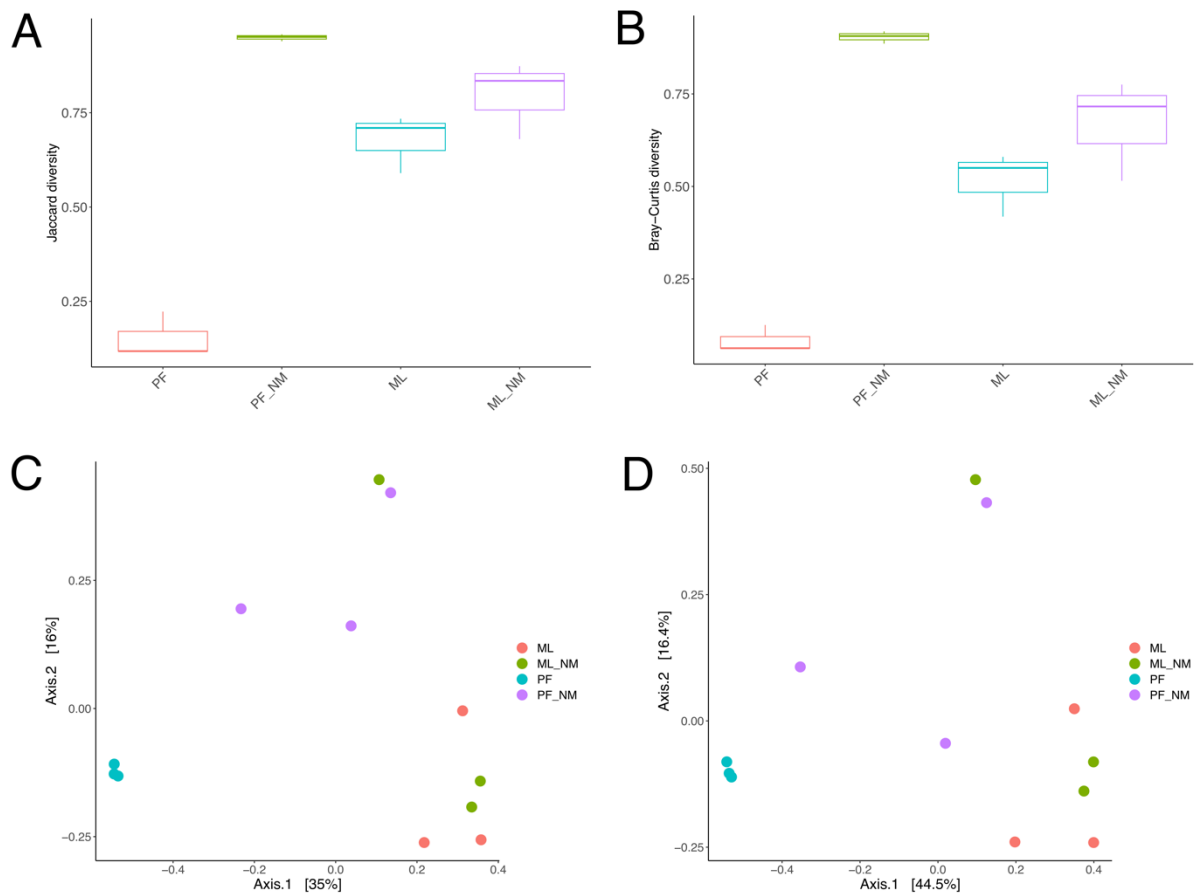

**Supplementary Figure 2.** Boxplot showing the relative abundance of ten (A-J) of the major bacterial genera identified in bovine raw milk following microbial DNA extraction with four different kits. Statistical differences between groups were analyzed by ANOVA followed by Tukey's test ( $n = 3/\text{group}$ ). Different letters indicate significant differences between groups ( $p < 0.05$ ). ML: MoLYsis complete5 kit; ML\_NM: MoLYsis complete5 kit performed with NEBNext Microbiome DNA Enrichment kit; PF: DNeasy PowerFood Microbial kit; PF\_NM: DNeasy PowerFood Microbial kit performed with NEBNext Microbiome DNA Enrichment kit.

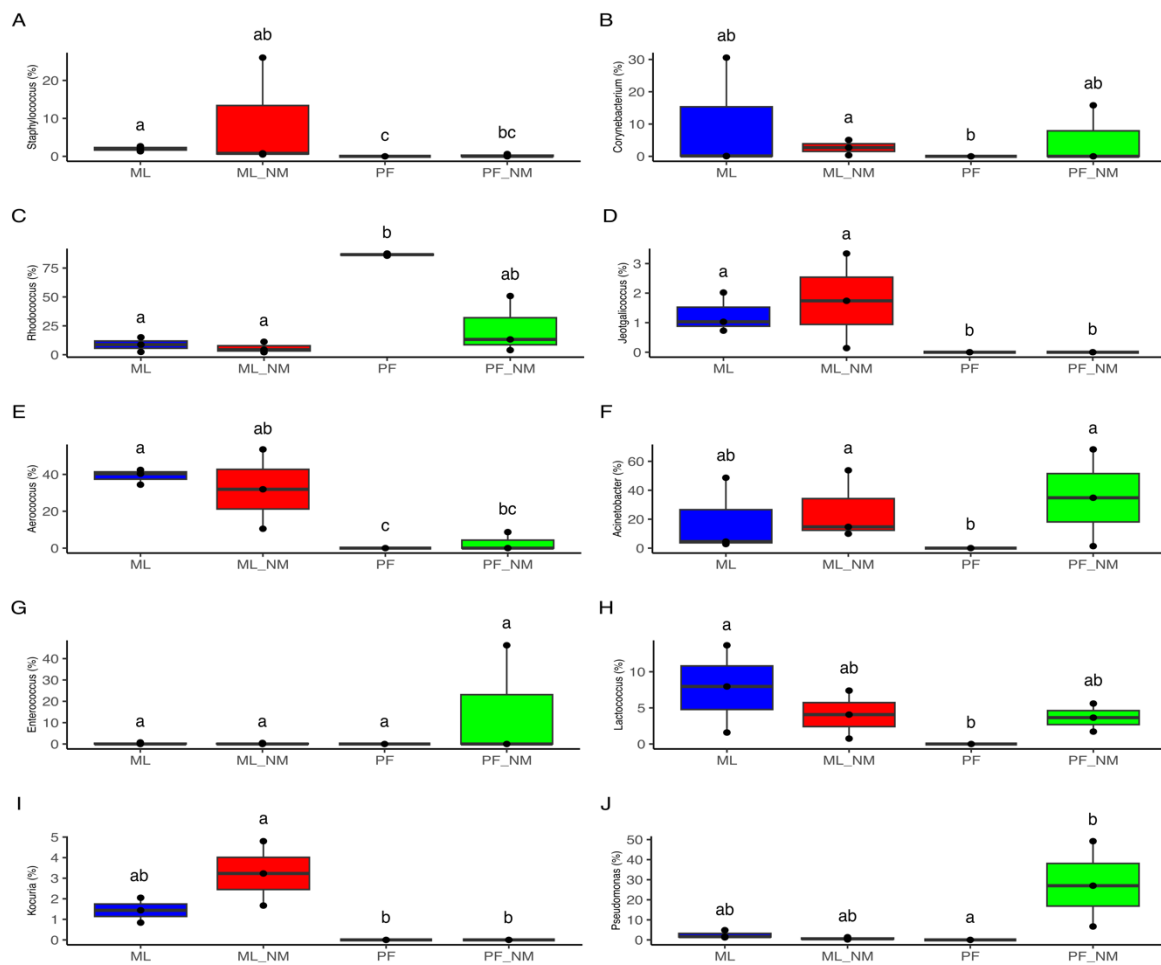

**Supplementary Figure 3.** Stacked bar plot based on the functional profiles of the bulk tank milk microbiota after DNA extraction and host depletion methods (n = 3/group). A) Absolute abundance of reads assigned to SUPER-FOCUS subsystem level 1 functions. B) Relative abundance of reads assigned to SUPER-FOCUS subsystem level 1 functions. ML: MoLYsis complete5 kit; ML-NM: MoLYsis complete5 kit performed with NEBNext Microbiome DNA Enrichment kit; PF: DNeasy PowerFood Microbial kit; PF-NM: DNeasy PowerFood Microbial kit performed with NEBNext Microbiome DNA Enrichment kit.

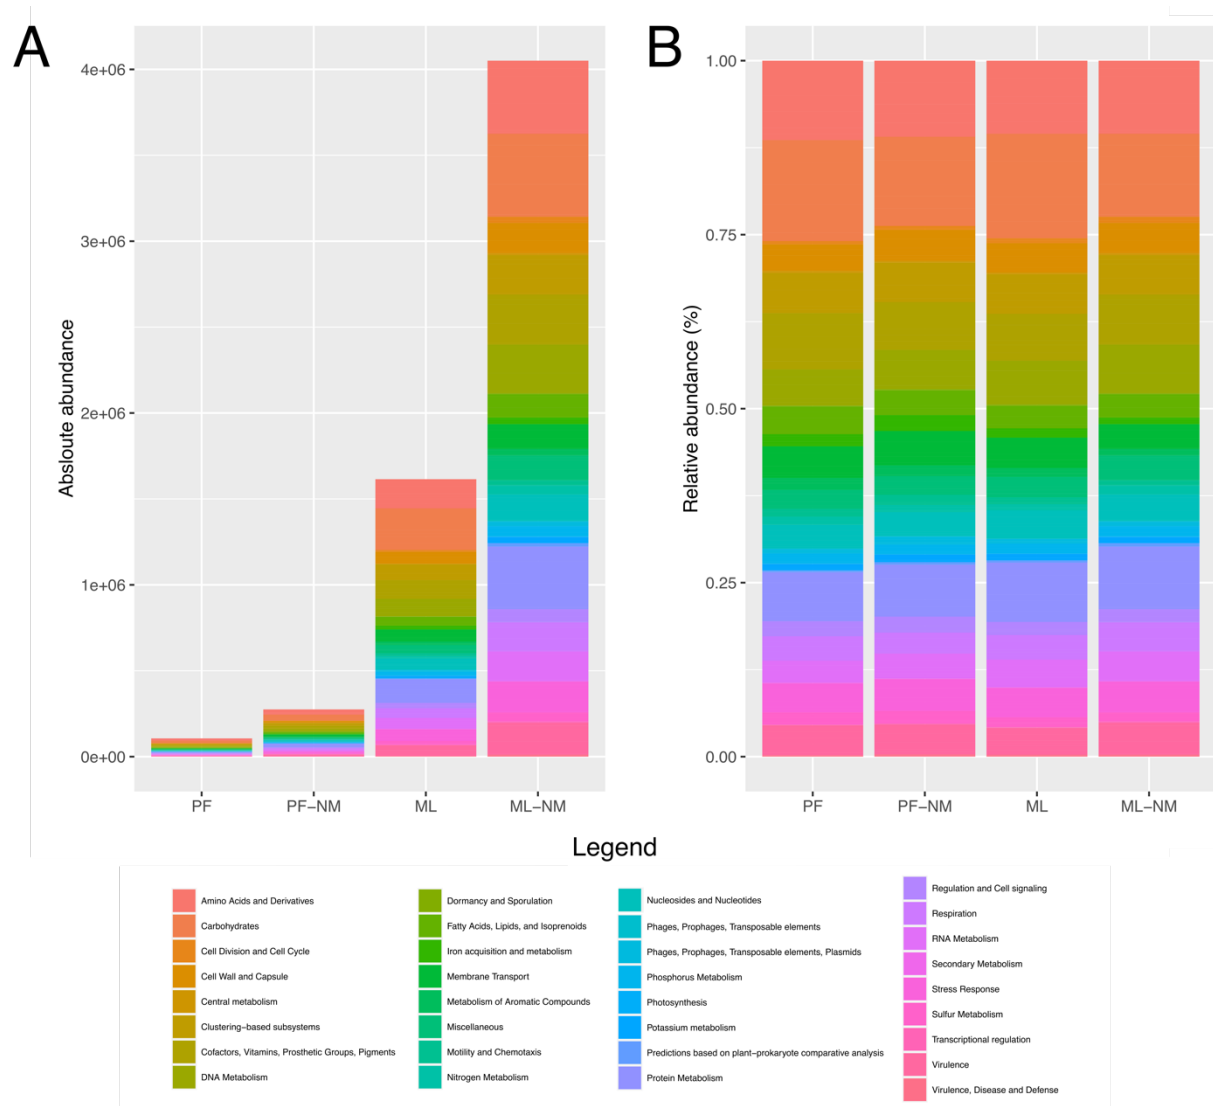

**Supplementary Figure 4.** Taxonomical assignment of metagenomics reads with Kraken2 after DNA extraction with MoYsis complete5 (n = 6/group). MDA and LongAmp were used to amplify microbial DNA before long-read sequencing.

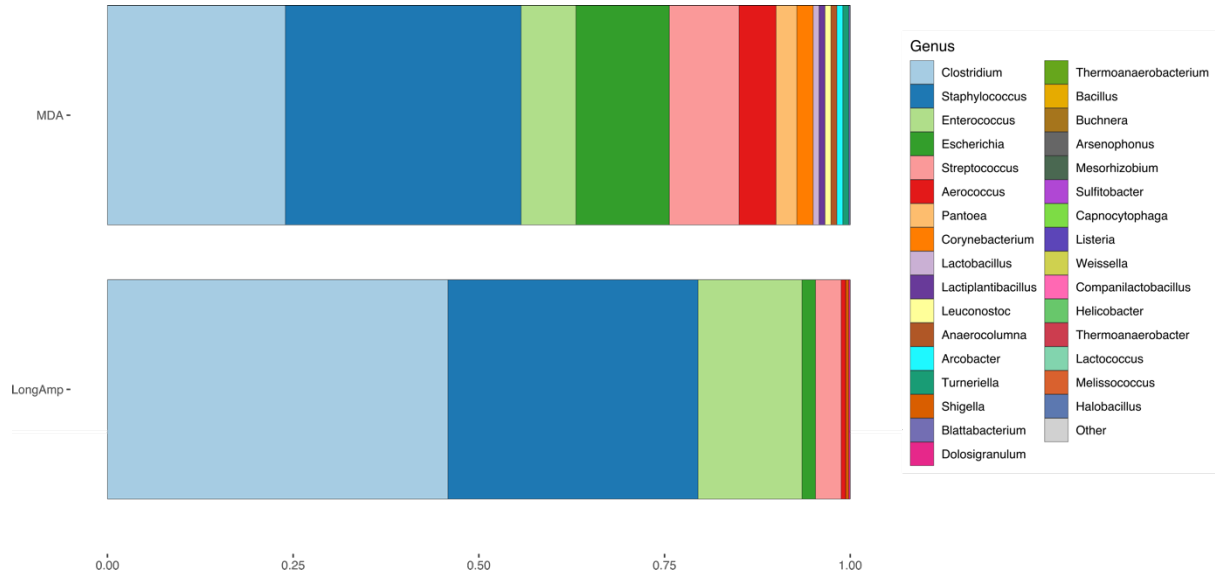

**Supplementary Figure 5.** Boxplot showing the relative abundance of ten (A-J) major bacterial genera identified in bovine hindmilk samples. Microbial DNA was extracted with MolYsis complete5 followed by amplification with MDA or LongAmp before long-read sequencing. Statistical difference between the groups was analyzed by the Wilcoxon test (n = 6/group).

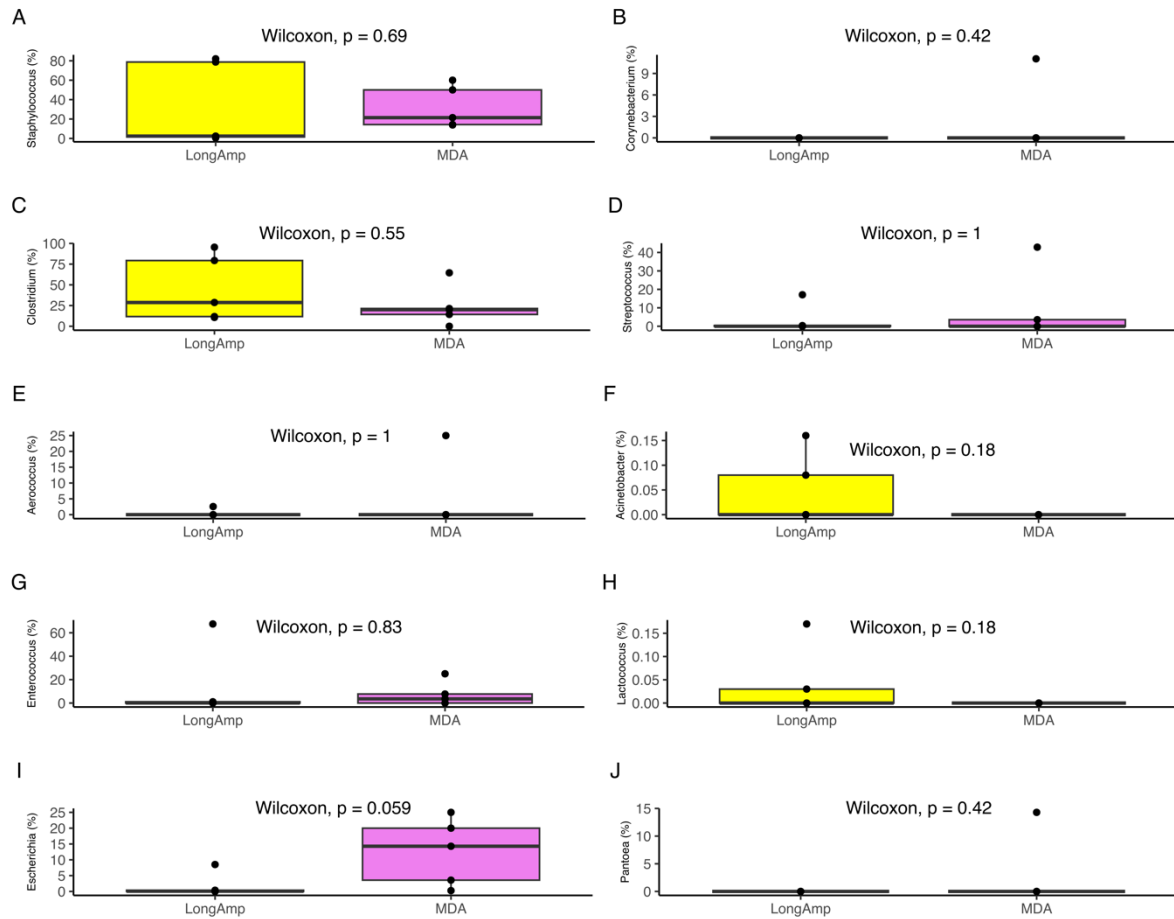

**Supplementary Figure 6.** Alpha diversity indices were calculated for LongAmp and MDA groups. Plots from A to D represent four different alpha-diversity measures. The median value is shown as a line within the box. Whiskers extend to the most extreme value within 1.5\*IQR. Statistical differences between groups were analyzed by the Wilcoxon test (n = 6/group).

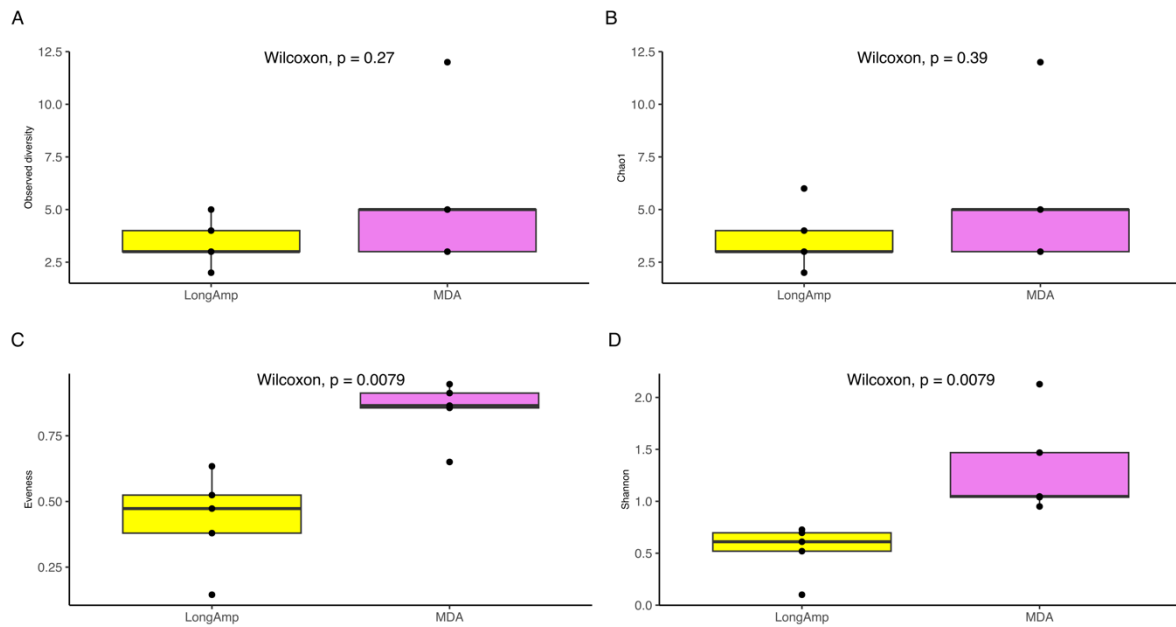

**Supplementary Figure 7.** Boxplot showing the relative abundance of thirty-three (A-AI) subsystems (SUPER-FOCUS level 1 functions). Microbial DNA was extracted with MolYsis complete5 followed by amplification with MDA or LongAmp before long-read sequencing. The median value is shown as a line within the box. Whiskers extend to the most extreme value within 1.5\*IQR. Statistical differences between groups were analyzed by the Wilcoxon test (n = 6/group).

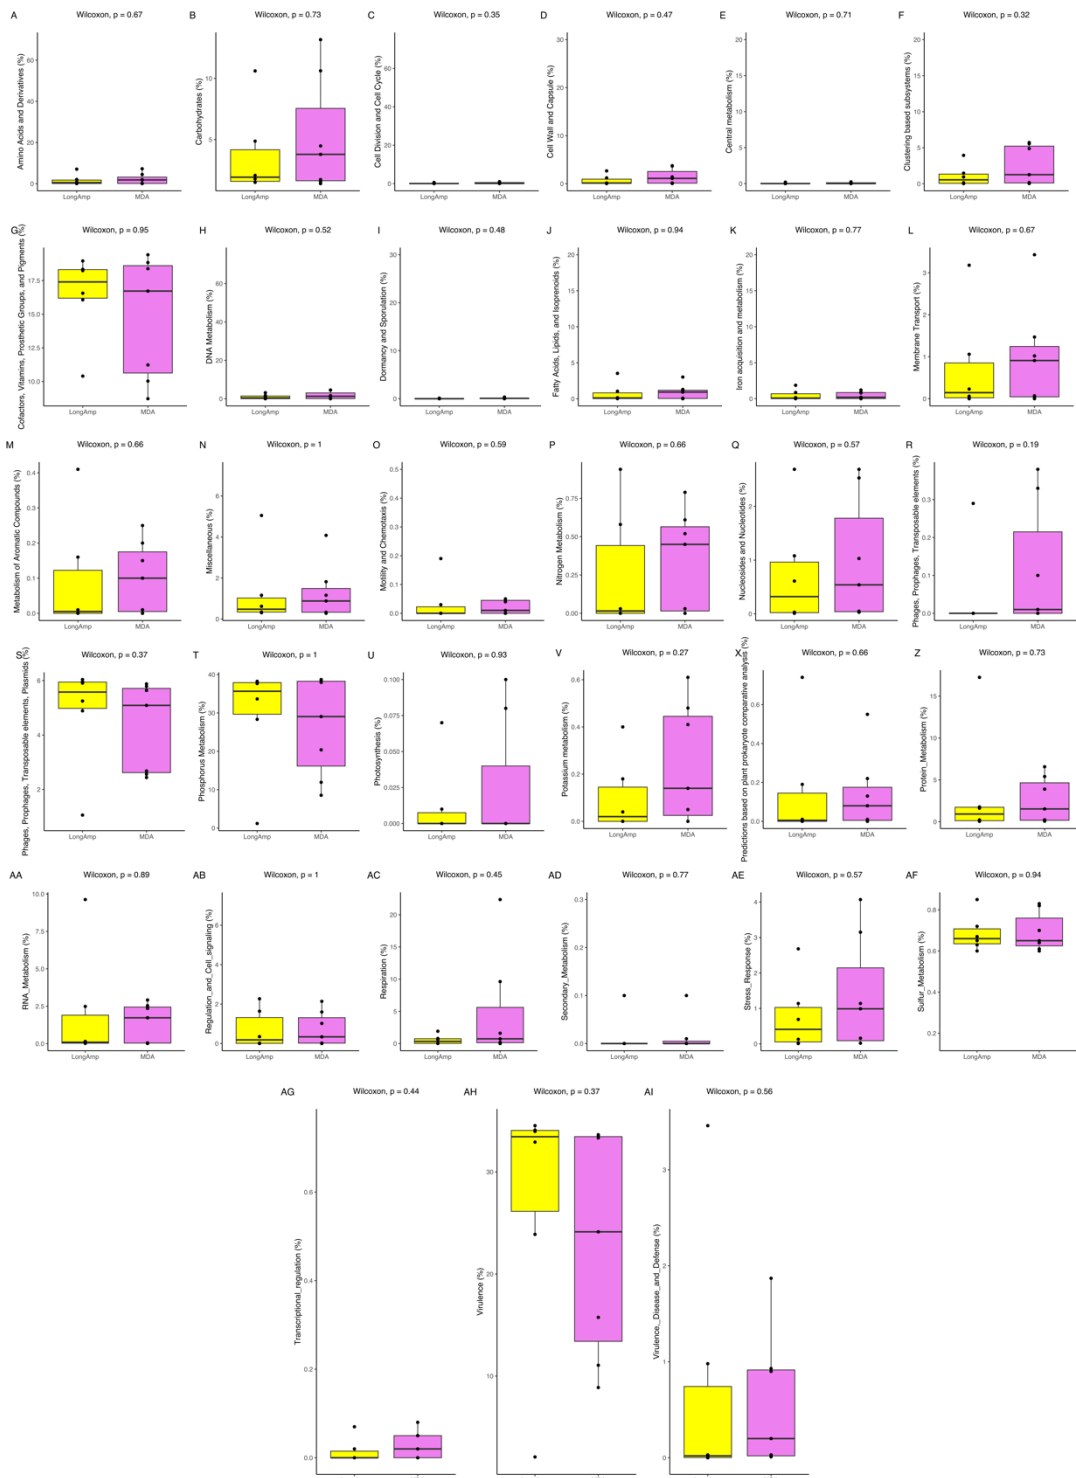

**Supplementary Figure 8.** Box and whisker plots comparing Shannon diversity (A) and Chao1 diversity (B) between MDA-treated and untreated samples. Horizontal bold lines show the median values. The bottom and top of the boxes show the 25th and the 75th percentiles, respectively. The whiskers extend up to the most extreme points within 1.5 times the interquartile ranges (IQR).

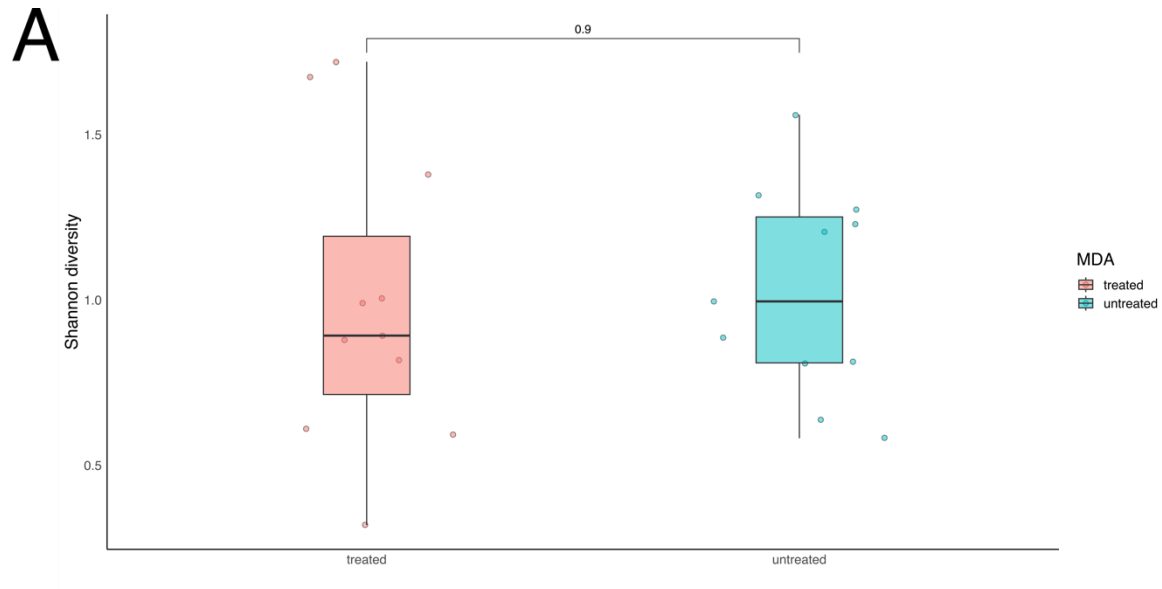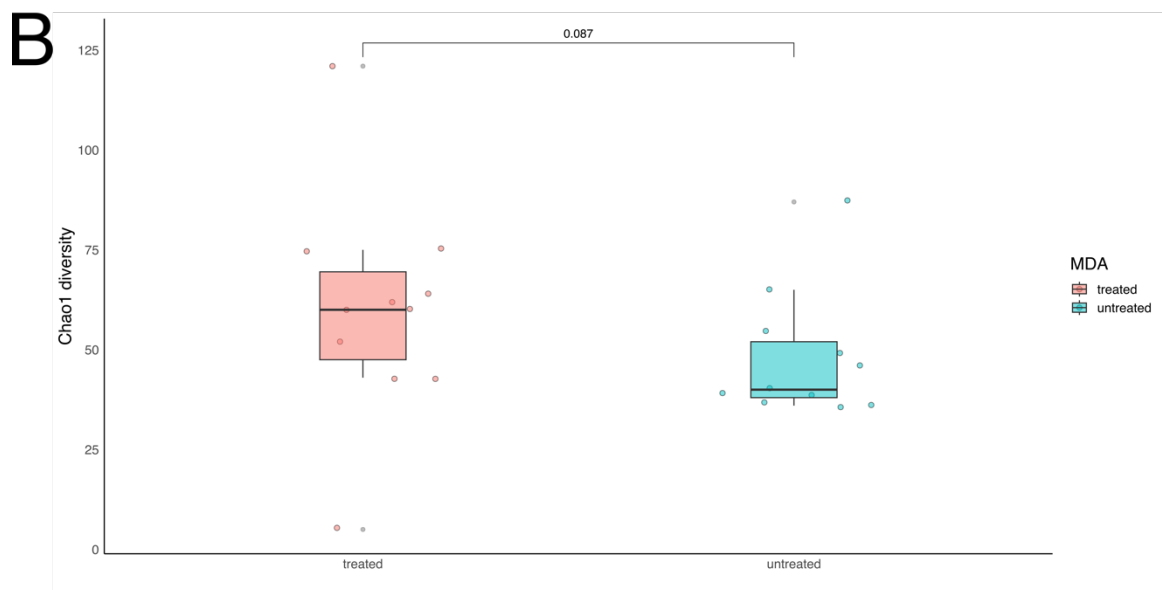



**Supplementary Table 1.** Statistical analyses of pairwise differences (pairwise-Adonis) in bulk tank milk microbiota. Microbial DNA was extracted with four different kits (n = 3/group). ML: MoLYsis complete5 kit; ML\_NM: MoLYsis complete5 kit performed with NEBNext Microbiome DNA Enrichment kit; PF: DNeasy PowerFood Microbial kit; PF\_NM: DNeasy PowerFood Microbial kit performed with NEBNext Microbiome DNA Enrichment kit.

| Pairwise Adonis (method: Jaccard) |              |       |                |           |                |                   |
|-----------------------------------|--------------|-------|----------------|-----------|----------------|-------------------|
|                                   | <b>Pairs</b> |       | <b>F.Model</b> | <b>R2</b> | <b>p.value</b> | <b>p.adjusted</b> |
| PF                                | vs           | PF_NM | 3.452891       | 0.4632955 | 0.1            | 0.6               |
| PF                                | vs           | ML    | 9.187646       | 0.6966858 | 0.1            | 0.6               |
| PF                                | vs           | ML_NM | 6.591283       | 0.6223309 | 0.1            | 0.6               |
| PF_NM                             | vs           | ML    | 1.662213       | 0.2935625 | 0.1            | 0.6               |
| PF_NM                             | vs           | ML_NM | 1.257252       | 0.2391462 | 0.2            | 1.0               |
| ML                                | vs           | ML_NM | 1.103416       | 0.2162112 | 0.4            | 1.0               |

  

| Pairwise Adonis (method: Bray-Curtis) |              |       |                |           |                |                   |
|---------------------------------------|--------------|-------|----------------|-----------|----------------|-------------------|
|                                       | <b>Pairs</b> |       | <b>F.Model</b> | <b>R2</b> | <b>p.value</b> | <b>p.adjusted</b> |
| PF                                    | vs           | PF_NM | 3.336187       | 0.4547576 | 0.1            | 0.6               |
| PF                                    | vs           | ML    | 16.298275      | 0.8029389 | 0.1            | 0.6               |
| PF                                    | vs           | ML_NM | 9.728852       | 0.7086428 | 0.1            | 0.6               |
| PF_NM                                 | vs           | ML    | 2.013405       | 0.3348194 | 0.1            | 0.6               |
| PF_NM                                 | vs           | ML_NM | 1.515940       | 0.2748289 | 0.2            | 1.0               |
| ML                                    | vs           | ML_NM | 1.241938       | 0.2369235 | 0.2            | 1.0               |

**Supplementary Table 2.** MetaQUAST report of the *de novo* assemblies generated with metaFlye of the six different datasets (H22, H25, H31, H34, H36, and H38) following LongAmp or MDA amplification using ONT reads. Samples H36 and 38 were excluded from this assessment because of the low quality following both procedures.

| Flye_LongAmp |                   |          |          |     |     |                                 |                      |                        |
|--------------|-------------------|----------|----------|-----|-----|---------------------------------|----------------------|------------------------|
| Sample       | contigs (>= 0 bp) | N50 (kb) | N75 (kb) | L50 | L75 | Genome fraction (%)             | Total aligned length | Mismatches per 100 kbp |
| H22          | 214               | 9,2      | 9,2      | 61  | 99  | 79.7 ( <i>S. haemolyticus</i> ) | 2108957              | 820.08                 |
| H25          | 185               | 5,5      | 3,9      | 60  | 109 | 41.9 ( <i>Strep. uberis</i> )   | 841739               | 545.01                 |
| H31          | 165               | 21,6     | 9,3      | 34  | 71  | 81.4 ( <i>S. chromogenes</i> )  | 1837334              | 1285.73                |
| H34          | 293               | 4,6      | 3,4      | 94  | 175 | 43.2 ( <i>E. faecium</i> )      | 1168769              | 430.93                 |

  

| Flye_MDA |                   |      |         |     |     |                                   |                      |                        |
|----------|-------------------|------|---------|-----|-----|-----------------------------------|----------------------|------------------------|
| Sample   | contigs (>= 0 bp) | N50  | N75     | L50 | L75 | Genome fraction (%)               | Total aligned length | Mismatches per 100 kbp |
| H22      | 2                 | 2322 | 2322236 | 1   | 1   | 88.1 ( <i>S. haemolyticus</i> )   | 2327897              | 820.95                 |
| H25      | 3                 | 26   | 26397   | 1   | 1   | 0.9 ( <i>Strep. uberis</i> )      | 25115                | 3711.31                |
| H31      | 20                | 14   | 8241    | 6   | 11  | 4.9 ( <i>S. chromogenes</i> )     | 120563               | 1254                   |
|          | 56                | 163  | 76334   | 6   | 3   | 87.8 ( <i>S. hominis</i> )        | 2059203              | 1502.67                |
| H34      | 27                | 272  | 122461  | 4   | 8   | 87.5 ( <i>E. faecium</i> )        | 2379903              | 355.7                  |
|          | 45                | 54   | 26712   | 9   | 18  | 35.3 ( <i>C. kroppenstedtii</i> ) | 976311               | 1133.05                |

**Supplementary Table 3.** Taxonomical assignment of metagenomics reads of MDA-treated and untreated samples with MetaPhlAn3.

| <b>Species</b>                        | <b>H22_MDA</b> | <b>H22</b> | <b>H25_MDA</b> | <b>H25</b> | <b>H31_MDA</b> | <b>H31</b> | <b>H34_MDA</b> | <b>H34</b> |
|---------------------------------------|----------------|------------|----------------|------------|----------------|------------|----------------|------------|
| <i>Cutibacterium acnes</i>            | 0,00           | 0,00       | 0,00           | 35,36      | 0,00           | 0,00       | 0,00           | 0,00       |
| <i>Staphylococcus haemolyticus</i>    | 99,74          | 99,78      | 0,00           | 0,00       | 0,00           | 0,00       | 0,00           | 0,00       |
| <i>Streptococcus uberis</i>           | 0,00           | 0,00       | 100,00         | 63,71      | 0,00           | 0,00       | 0,00           | 0,00       |
| <i>Staphylococcus chromogenes</i>     | 0,00           | 0,00       | 0,00           | 0,00       | 100,00         | 100,00     | 0,00           | 0,00       |
| <i>Corynebacterium kroppenstedtii</i> | 0,00           | 0,00       | 0,00           | 0,00       | 0,00           | 0,00       | 3,86           | 0,00       |
| <i>Staphylococcus hominis</i>         | 0,00           | 0,00       | 0,00           | 0,00       | 0,00           | 0,00       | 27,29          | 11,52      |
| <i>Enterococcus faecium</i>           | 0,00           | 0,00       | 0,00           | 0,00       | 0,00           | 0,00       | 68,85          | 88,48      |
